# Supplementary material for: Fucoidans from Cucumaria frondosa ameliorate renal interstitial fibrosis via inhibition of the PI3K/Akt/NF-κB signaling pathway
Source: Royal Society of Chemistry journal article supplement (doi:10.1039/d1fo03067a), 2021-12-16
Supplement: d1fo03067a2.pdf [file d1fo03067a2.pdf]

PI3K

AKT

p65

GAPDH

P-AKT

P-p65

GAPDH
