# Supplementary material for: Fucoidans from Cucumaria frondosa ameliorate renal interstitial fibrosis via inhibition of the PI3K/Akt/NF-κB signaling pathway
Source: Royal Society of Chemistry journal article supplement (doi:10.1039/d1fo03067a), 2021-12-16
Supplement: d1fo03067a3.pdf [file d1fo03067a3.pdf]

1 **Fucoidans from *Cucumaria frondosa* ameliorates renal interstitial fibrosis via**  
2 **inhibition of PI3K/Akt/NF- $\kappa$ B signaling pathway**

3 Zhuoyue Song <sup>1,a,\*</sup>, Yao Chen <sup>1,a</sup>, Jun Wu <sup>1,b</sup>, Mengru Zhu <sup>a</sup>, Tian Yu <sup>a</sup>, Xianying Ye <sup>a</sup>,  
4 Shijie Li, Nenggui Xu <sup>a,\*\*</sup>

5 <sup>a</sup> Clinical Medical College of Acupuncture Moxibustion and Rehabilitation  
6 Guangzhou University of Chinese Medicine, Guangzhou 510006, Guangdong, PR  
7 China

8 <sup>b</sup> School of Chinese Medicine, Shandong College of Traditional Chinese Medicine,  
9 Yantai 264199, Shandong, PR China

---

\*\* Corresponding author: Nenggui Xu, Email: ngxu8018@163.com

\* Corresponding author: Zhuoyue Song, Email: sw6477\_2@126.com

<sup>1</sup> These authors contributed equally to this paper.

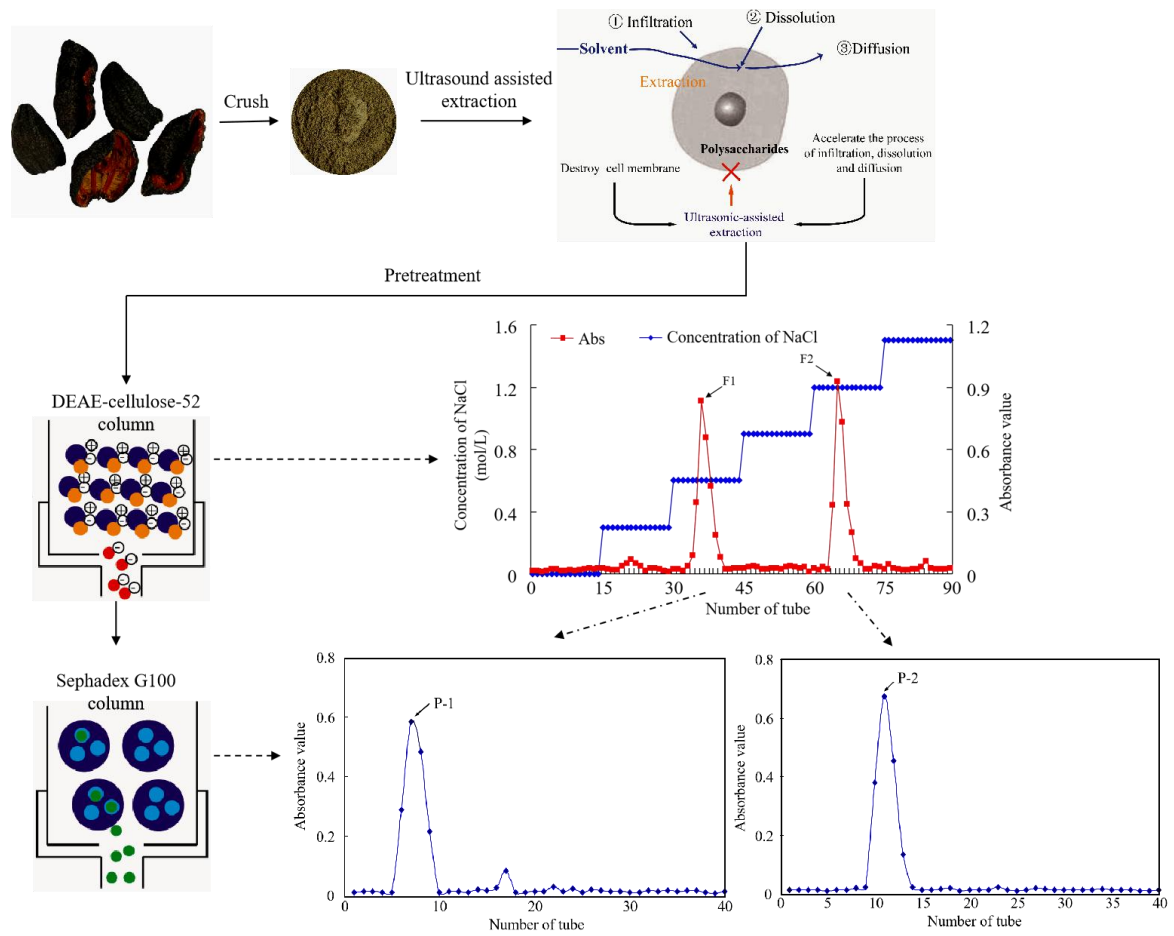

**Figure S1** Preparation and purification of CFP.

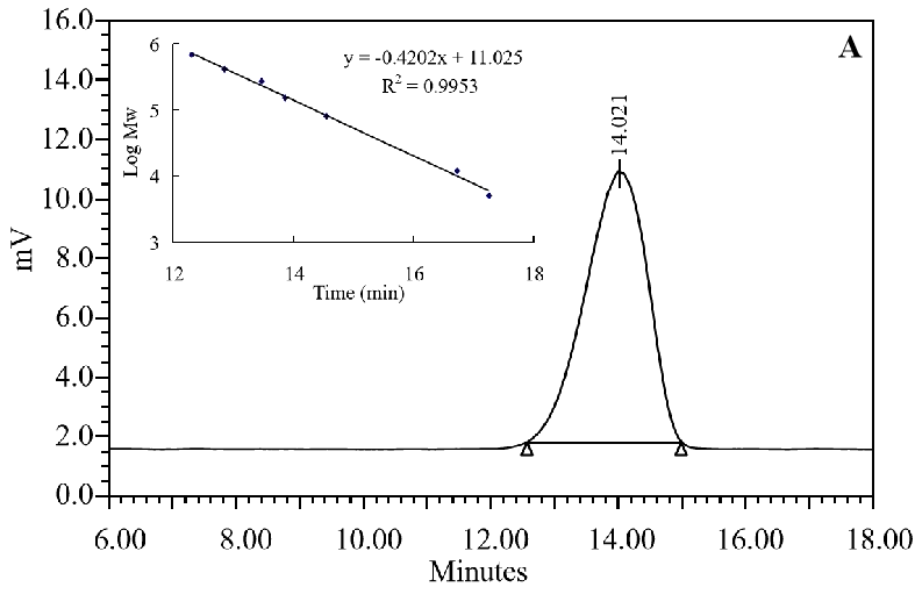

1

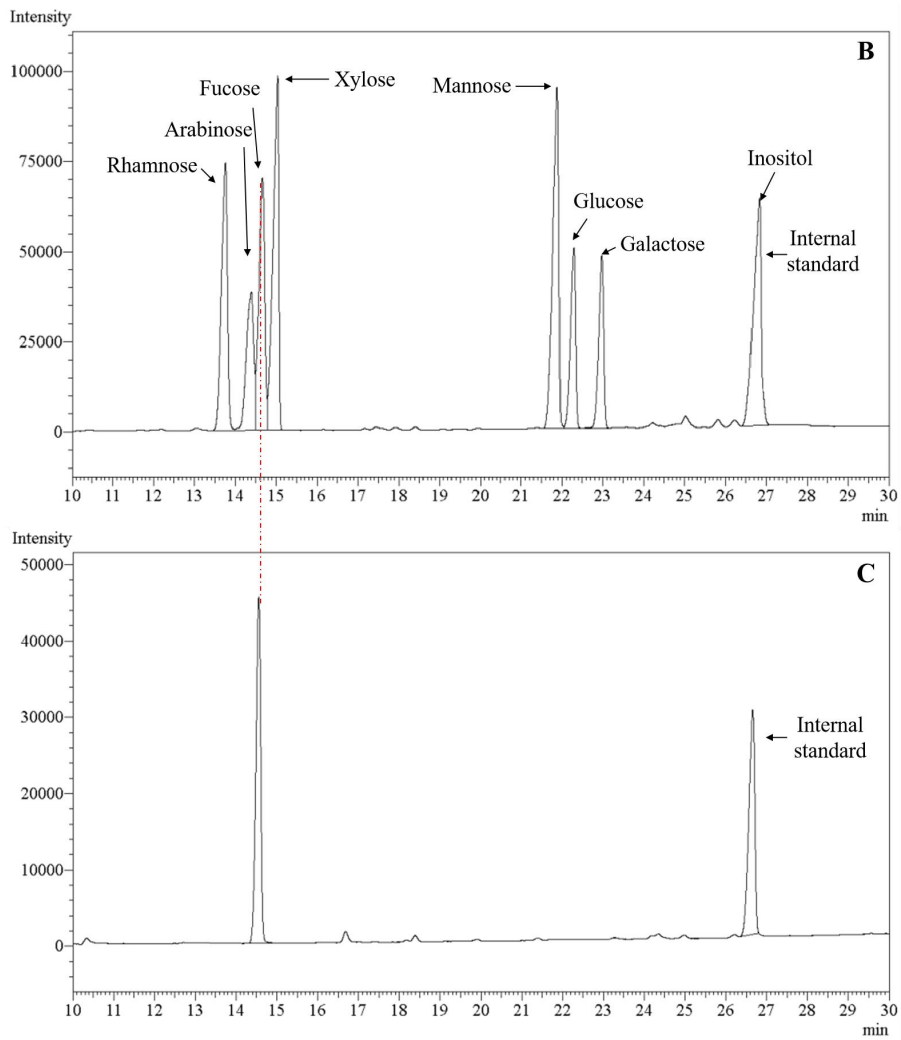

2

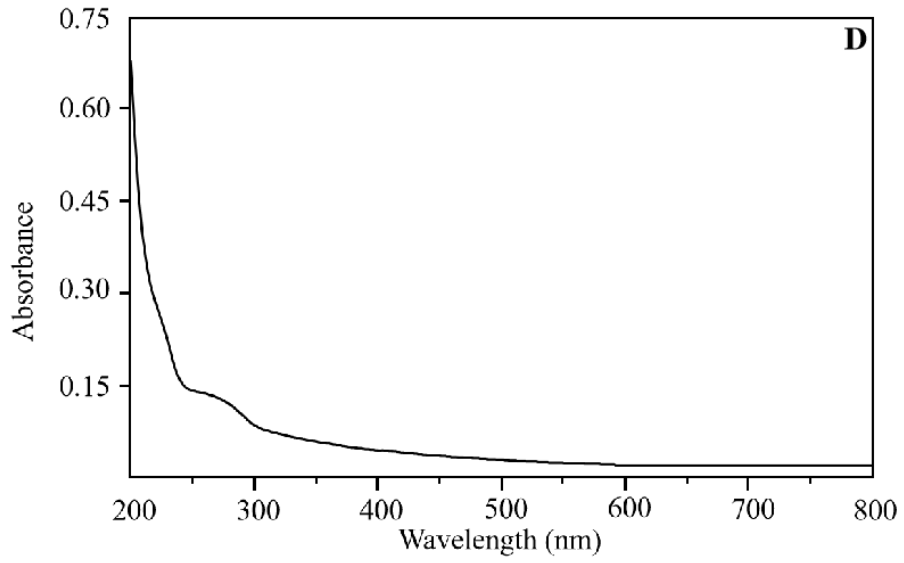

3

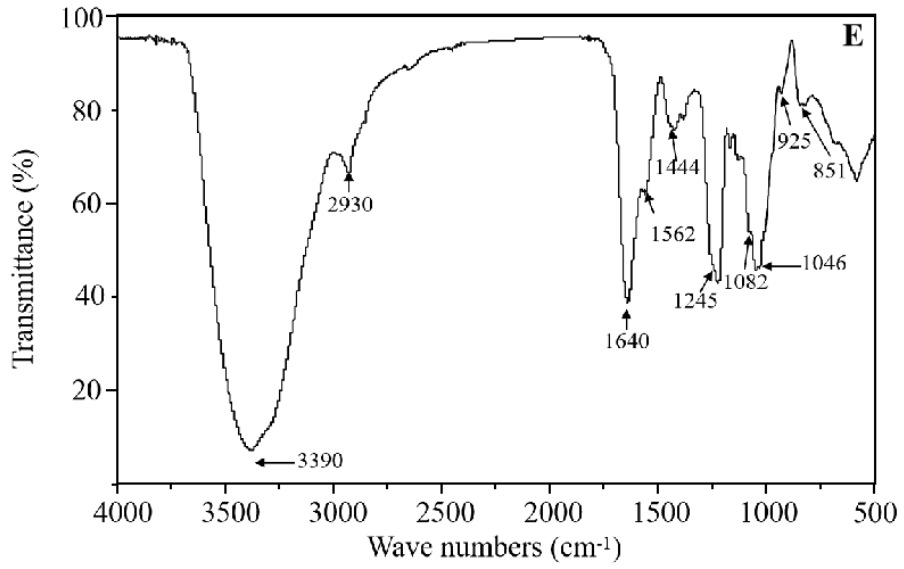

4

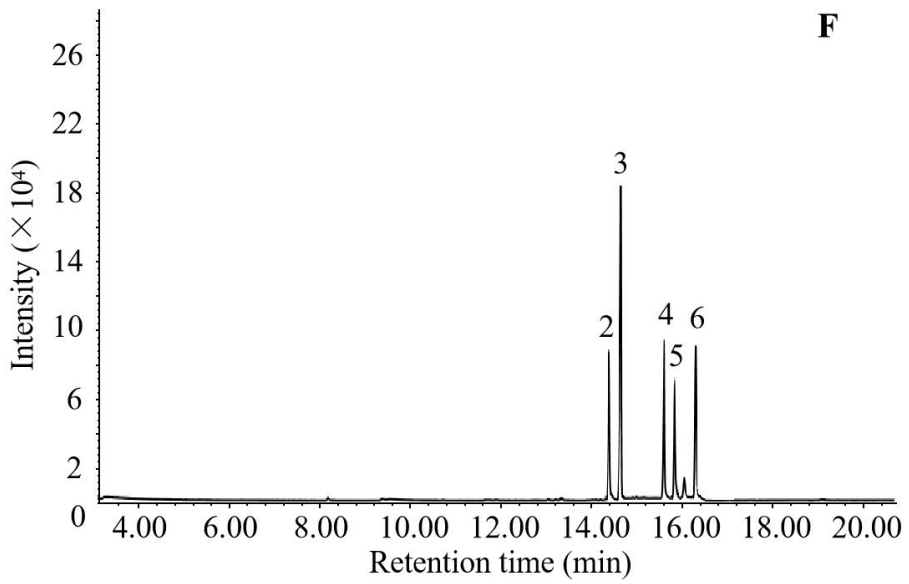

5

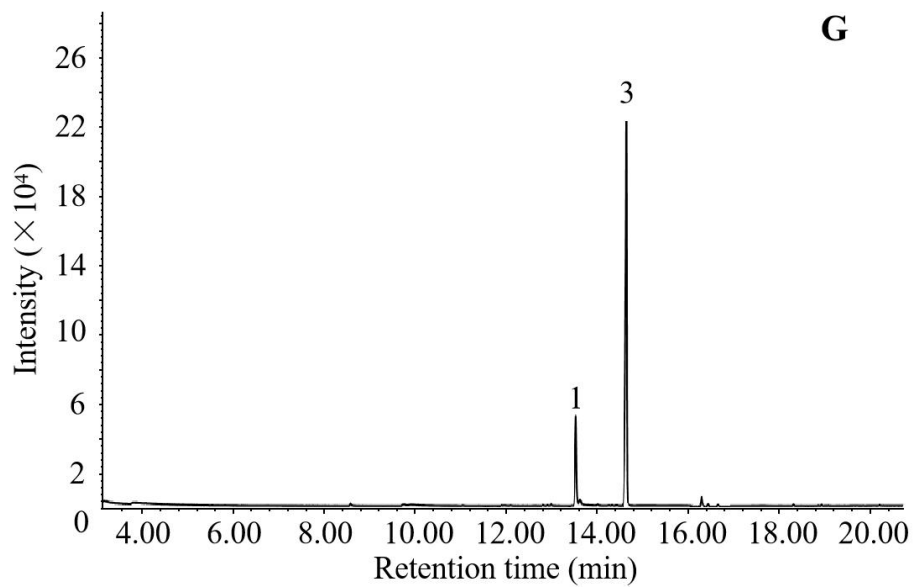

6

7 **Figure S2** The graph of HPSEC (A), GC (B and C), UV-is (D), FT-IR (E), GC-MS (F

8 and G).

9 **Table S1** GC-MS results of CFP and dsCFP.

| No. | Retention time (min) | Methylated sugar residue                      | Linkage            | Molar ratio |        |
|-----|----------------------|-----------------------------------------------|--------------------|-------------|--------|
|     |                      |                                               |                    | CF P        | dsCF P |
| 1   | 13.978               | 1, 5-di-O-acetyl-2, 3, 4-tri-O-methyl-Fuc     | L-Fucp-(1→         | -           | 1.00   |
| 2   | 14.396               | 1, 4, 5-tri-O-acetyl-2, 3-di-O-methyl-Fuc     | →4)-L-Fucp-(1→     | 1.00        | -      |
| 3   | 14.702               | 1, 3, 5-tri-O-acetyl-2, 4-di-O-methyl-Fuc     | →3)-L-Fucp-(1→     | 1.92        | 5.18   |
| 4   | 15.601               | 1, 2, 3, 5-tetra-O-acetyl-4-mono-O-methyl-Fuc | →2,3)-L-Fucp-(1→   | 1.05        | -      |
| 5   | 15.814               | 1, 3, 4, 5-tetra-O-acetyl-2-mono-O-methyl-Fuc | →3,4)-L-Fucp-(1→   | 0.89        | -      |
| 6   | 16.322               | 1, 2, 3, 4, 5-penta-O-acetyl-Fuc              | →2,3,4)-L-Fucp-(1→ | 1.07        | -      |

10 “-” means not detected.

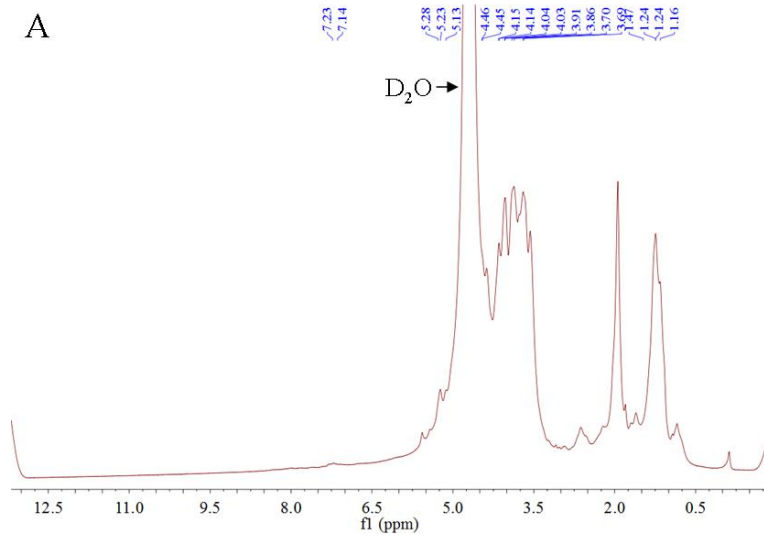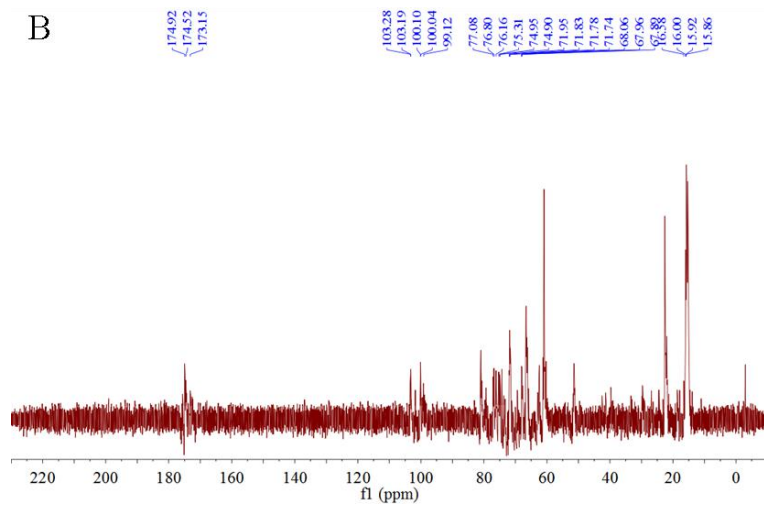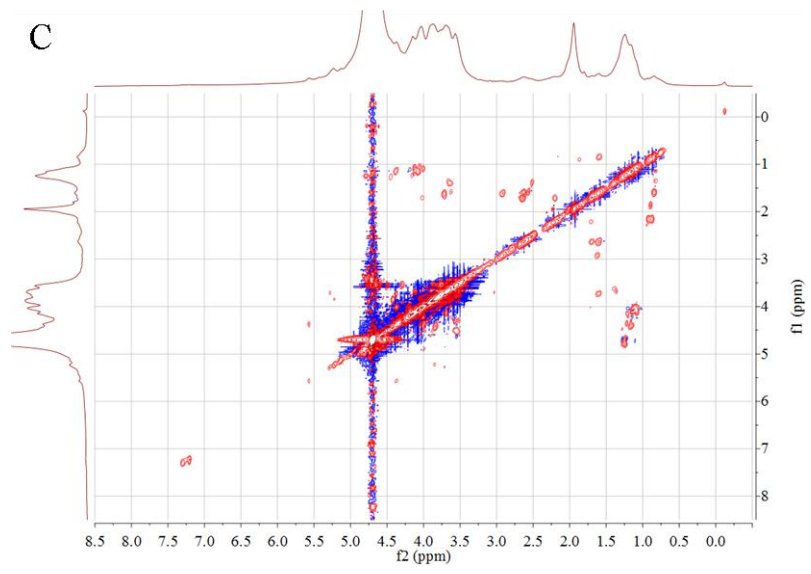

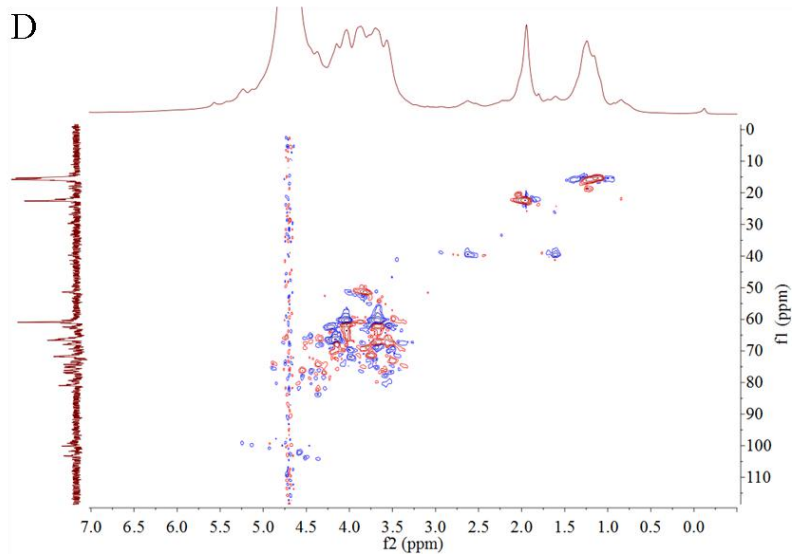

14

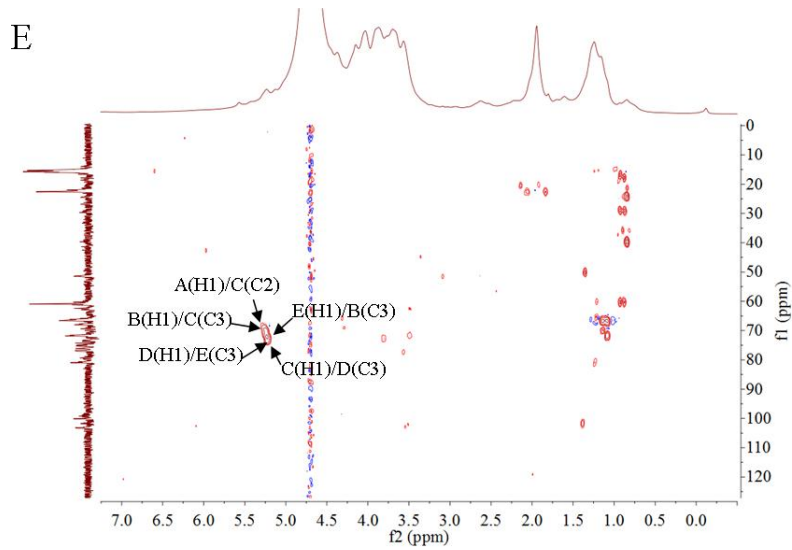

15

16 **Figure S3**  $^1\text{H}$  NMR(A)、 $^{13}\text{C}$  NMR(B)、 $^1\text{H}$ - $^1\text{H}$  COSY(C)、 $^1\text{H}$ - $^{13}\text{C}$  HSQC (D)和  $^1\text{H}$ - $^{13}\text{C}$

17 HMBC (E) of CFP



18 **Table S2**  $^{13}\text{C}$  and  $^1\text{H}$  chemical shifts of sugar residues in CFP.

| Sugar residues |                                                                                           | Chemical shifts (ppm) |        |       |       |       |       |       |
|----------------|-------------------------------------------------------------------------------------------|-----------------------|--------|-------|-------|-------|-------|-------|
|                |                                                                                           | 1                     | 2      | 3     | 4     | 5     | 6     |       |
| A              | $\text{SO}_3^-$ -O-4- $\alpha$ -L-Fucp-(1 $\rightarrow$                                   | H                     | 5.28   | 3.91  | 4.37  | 4.14  | 4.46  | 1.16  |
|                |                                                                                           | C                     | 99.12  | 69.68 | 71.74 | 74.95 | 67.82 | 16.58 |
| B              | $\rightarrow$ 3)- $\alpha$ -L-Fucp-(1 $\rightarrow$                                       | H                     | 5.28   | 3.91  | 4.29  | 4.15  | 4.45  | 1.24  |
|                |                                                                                           | C                     | 100.04 | 69.72 | 71.83 | 75.31 | 67.89 | 15.82 |
| C              | $\rightarrow$ 2 $\text{SO}_3^-$ ,3)- $\alpha$ -L-Fucp-(1 $\rightarrow$                    | H                     | 5.23   | 4.15  | 4.28  | 4.15  | 4.42  | 1.24  |
|                |                                                                                           | C                     | 100.10 | 69.78 | 71.95 | 76.16 | 67.96 | 15.92 |
| D              | $\rightarrow$ 3,4 $\text{SO}_3^-$ )- $\alpha$ -L-Fucp-(1 $\rightarrow$                    | H                     | 5.23   | 3.86  | 4.28  | 4.14  | 4.42  | 1.47  |
|                |                                                                                           | C                     | 103.19 | 69.87 | 72.88 | 76.80 | 67.96 | 16.00 |
| E              | $\rightarrow$ 2 $\text{SO}_3^-$ ,3,4 $\text{SO}_3^-$ )- $\alpha$ -L-Fucp-(1 $\rightarrow$ | H                     | 5.13   | 4.04  | 4.28  | 4.15  | 4.46  | 1.47  |
|                |                                                                                           | C                     | 103.28 | 69.97 | 72.35 | 77.08 | 68.06 | 16.58 |

19



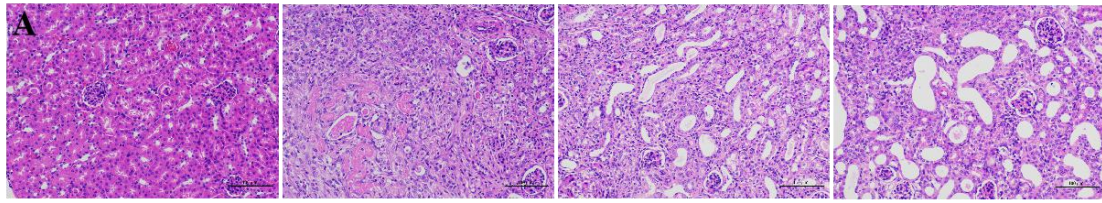

Sham

UUO

25 mg/kg CFP

50 mg/kg CFP

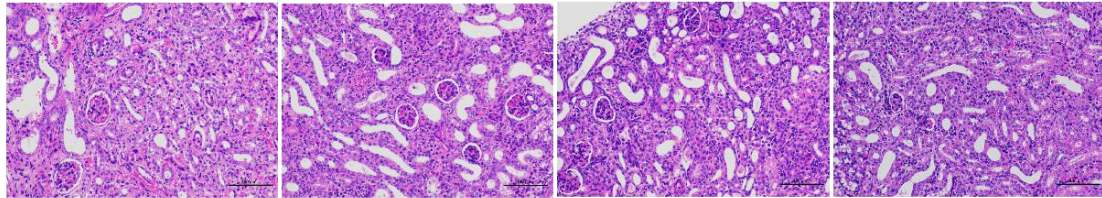

100 mg/kg CFP

200 mg/kg CFP

400 mg/kg CFP

800 mg/kg CFP

22

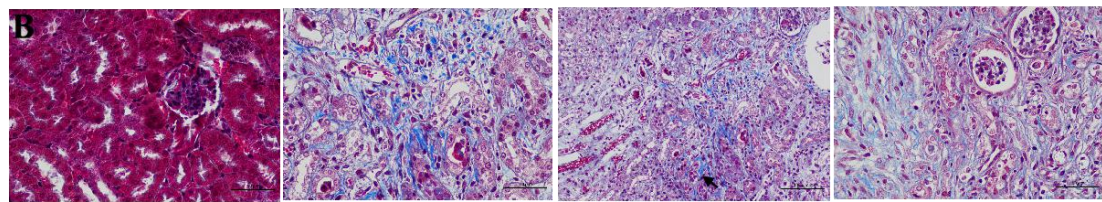

Sham

UUO

25 mg/kg CFP

50 mg/kg CFP

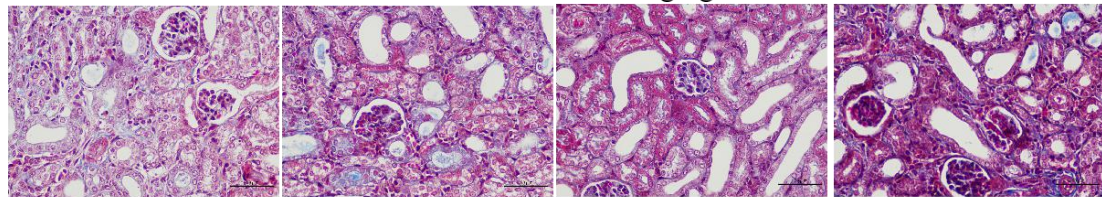

100 mg/kg CFP

200 mg/kg CFP

400 mg/kg CFP

800 mg/kg CFP

23

24 **Figure S5** The histopathological observation based on H&E (A) and Masson staining

25 (B) of pre-experiment results

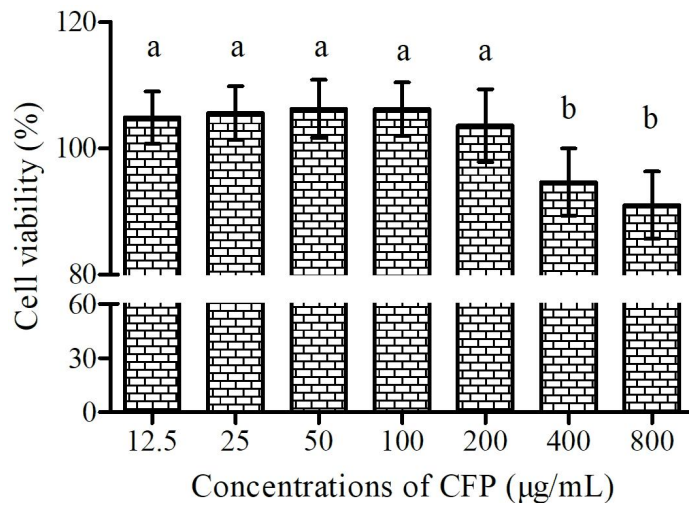

26

27 **Figure S6** Cell viability of CFP (different letters in superscript represent significant

28 differences,  $P < 0.05$ )
